# Supplementary material for: A pair of novel Zn(ii) enantiomeric coordination polymers based on a chiral multicarboxylate ligand: synthesis, crystal structures and molecular recognition properties
Source: Royal Society of Chemistry journal article supplement (doi:10.1039/c7ra08433a), 2017-01-01
Supplement: c7ra08433a1.pdf [file c7ra08433a1.pdf]

## Supporting Information

### **A pair of novel Zn(II) enantiomeric coordination polymers based on chiral multicarboxylate Ligand: Synthesis, crystal structures and molecular recognizing properties**

*Lei Gu<sup>a</sup>, Han-Zhong Zhang,<sup>a</sup> Wen-HongJiang,<sup>a</sup> Guang-Feng Hou,<sup>b</sup> Ying-Hui Yu,<sup>a</sup> and Dong-Sheng Ma<sup>\*a</sup>*

<sup>a</sup>School of Chemistry and Materials Science, Heilongjiang University, Harbin 150080, PR China. E-mail: madongsheng@hlju.edu.cn (D.-S. Ma). Fax: +86-451-86609151.

<sup>b</sup>Agricultural college, Heilongjiang University, Harbin 150080, PR China.

**Corresponding Author.** \*Tel.: +86 451 86609001; Fax: +86 451 86609151; E-mail: madongsheng@hlju.edu.cn (D.-S. Ma).

**Table S1.** Selected bond distances (Å) and angles (°) for **1-R** and **1-S**

**Figure S1.** PXRD patterns of **1-R** and **1-S**

**Figure S2.** TGA curves of **1-R**

**Figure S3.** TGA curves of **1-S**

**Figure S4.** The IR spectra of **1-R**

**Figure S5.** The IR spectra of **1-R**

**Figure S6.** Solid-state UV curves of **1-R** and **1-S**

Table S1: Selected Bond Lengths (Å) and Bond Angles (deg) for complexes **1-R** and **1-S**

| Complex 1-R          |          |                      |          |
|----------------------|----------|----------------------|----------|
| O(1)-Zn(4)           | 2.088(8) | O(16)-Zn(1)          | 2.062(7) |
| O(1)-Zn(1)           | 2.127(8) | O(16)-Zn(3)          | 2.112(7) |
| O(3)-Zn(1)           | 2.318(7) | O(17)-Zn(2)          | 2.195(9) |
| O(4)-Zn(2)           | 2.144(7) | O(18)-Zn(4)          | 2.167(9) |
| O(8)-Zn(3)           | 2.099(8) | Zn(1)-O(14)#2        | 2.002(8) |
| O(8)-Zn(2)           | 2.149(8) | Zn(1)-O(5)#3         | 2.121(7) |
| O(10)-Zn(3)          | 2.337(7) | Zn(2)-O(13)#2        | 1.975(6) |
| O(11)-Zn(4)          | 2.119(8) | Zn(2)-O(11)#1        | 2.097(6) |
| O(15)-Zn(3)          | 2.051(6) | Zn(3)-O(6)#4         | 2.029(8) |
| O(15)-Zn(4)          | 2.078(7) | Zn(3)-O(12)#1        | 2.096(6) |
| O(15)-Zn(1)          | 2.101(7) | Zn(4)-O(7)#4         | 1.991(7) |
| O(16)-Zn(2)          | 2.048(8) | Zn(4)-O(4)#3         | 2.126(6) |
| O(14)#2-Zn(1)-O(16)  | 100.4(3) | O(6)#4-Zn(3)-O(15)   | 100.1(3) |
| O(14)#2-Zn(1)-O(15)  | 111.3(3) | O(6)#4-Zn(3)-O(12)#1 | 80.4(3)  |
| O(16)-Zn(1)-O(15)    | 83.4(2)  | O(15)-Zn(3)-O(12)#1  | 179.4(3) |
| O(14)#2-Zn(1)-O(5)#3 | 79.0(3)  | O(6)#4-Zn(3)-O(8)    | 164.5(3) |
| O(16)-Zn(1)-O(5)#3   | 175.9(3) | O(15)-Zn(3)-O(8)     | 94.0(3)  |
| O(15)-Zn(1)-O(5)#3   | 100.6(3) | O(12)#1-Zn(3)-O(8)   | 85.6(3)  |
| O(14)#2-Zn(1)-O(1)   | 160.5(3) | O(6)#4-Zn(3)-O(16)   | 109.6(3) |
| O(16)-Zn(1)-O(1)     | 97.3(3)  | O(15)-Zn(3)-O(16)    | 83.4(2)  |
| O(15)-Zn(1)-O(1)     | 78.7(3)  | O(12)#1-Zn(3)-O(16)  | 96.1(3)  |
| O(5)#3-Zn(1)-O(1)    | 82.8(3)  | O(8)-Zn(3)-O(16)     | 78.3(3)  |
| O(14)#2-Zn(1)-O(3)   | 99.3(3)  | O(6)#4-Zn(3)-O(10)   | 100.5(3) |
| O(16)-Zn(1)-O(3)     | 91.2(3)  | O(15)-Zn(3)-O(10)    | 98.4(3)  |
| O(15)-Zn(1)-O(3)     | 149.4(3) | O(12)#1-Zn(3)-O(10)  | 81.9(3)  |
| O(5)#3-Zn(1)-O(3)    | 84.9(3)  | O(8)-Zn(3)-O(10)     | 70.8(3)  |

|                                                                                       |          |                     |          |
|---------------------------------------------------------------------------------------|----------|---------------------|----------|
| O(1)-Zn(1)-O(3)                                                                       | 72.1(3)  | O(16)-Zn(3)-O(10)   | 149.2(3) |
| O(13)#2-Zn(2)-O(16)                                                                   | 101.0(3) | O(7)#4-Zn(4)-O(15)  | 100.7(3) |
| O(13)#2-Zn(2)-O(11)#1                                                                 | 165.0(3) | O(7)#4-Zn(4)-O(1)   | 93.8(3)  |
| O(16)-Zn(2)-O(11)#1                                                                   | 93.2(3)  | O(15)-Zn(4)-O(1)    | 80.1(3)  |
| O(13)#2-Zn(2)-O(4)                                                                    | 92.9(3)  | O(7)#4-Zn(4)-O(11)  | 96.2(3)  |
| O(16)-Zn(2)-O(4)                                                                      | 103.4(3) | O(15)-Zn(4)-O(11)   | 101.2(3) |
| O(11)#1-Zn(2)-O(4)                                                                    | 78.9(3)  | O(1)-Zn(4)-O(11)    | 169.5(3) |
| O(13)#2-Zn(2)-O(8)                                                                    | 96.4(3)  | O(7)#4-Zn(4)-O(4)#3 | 166.9(3) |
| O(16)-Zn(2)-O(8)                                                                      | 78.6(3)  | O(15)-Zn(4)-O(4)#3  | 92.2(3)  |
| O(11)#1-Zn(2)-O(8)                                                                    | 91.2(3)  | O(1)-Zn(4)-O(4)#3   | 90.7(3)  |
| O(4)-Zn(2)-O(8)                                                                       | 169.9(2) | O(11)-Zn(4)-O(4)#3  | 78.8(3)  |
| O(13)#2-Zn(2)-O(17)                                                                   | 84.6(3)  | O(7)#4-Zn(4)-O(18)  | 86.3(3)  |
| O(16)-Zn(2)-O(17)                                                                     | 168.9(3) | O(15)-Zn(4)-O(18)   | 169.0(3) |
| O(11)#1-Zn(2)-O(17)                                                                   | 82.2(3)  | O(1)-Zn(4)-O(18)    | 91.0(3)  |
| O(4)-Zn(2)-O(17)                                                                      | 85.7(3)  | O(11)-Zn(4)-O(18)   | 86.3(3)  |
| O(8)-Zn(2)-O(17)                                                                      | 91.3(3)  | O(4)#3-Zn(4)-O(18)  | 81.3(3)  |
| Symmetry codes: (I) -1+x, y, z; (II) -1+x, y, -1+z; (III) 1+x, y, z; (IV) 1+x, y, 1+z |          |                     |          |

| Complex 1-S |          |               |          |
|-------------|----------|---------------|----------|
| O(1)-Zn(4)  | 2.147(6) | O(16)-Zn(4)   | 2.059(6) |
| O(5)-Zn(1)  | 2.315(6) | O(16)-Zn(3)   | 2.121(6) |
| O(6)-Zn(2)  | 2.084(6) | O(17)-Zn(4)   | 2.180(7) |
| O(6)-Zn(1)  | 2.126(6) | O(18)-Zn(2)   | 2.163(7) |
| O(8)-Zn(2)  | 2.134(6) | Zn(1)-O(10)#2 | 2.008(6) |
| O(12)-Zn(3) | 2.357(6) | Zn(1)-O(2)#3  | 2.119(5) |
| O(13)-Zn(3) | 2.106(7) | Zn(2)-O(4)#4  | 1.984(5) |
| O(13)-Zn(4) | 2.149(6) | Zn(2)-O(1)#3  | 2.119(5) |
| O(15)-Zn(3) | 2.044(6) | Zn(3)-O(3)#4  | 2.030(6) |
| O(15)-Zn(2) | 2.077(7) | Zn(3)-O(9)#1  | 2.087(6) |

|                      |          |                      |          |
|----------------------|----------|----------------------|----------|
| O(15)-Zn(1)          | 2.098(6) | Zn(4)-O(11)#2        | 1.978(5) |
| O(16)-Zn(1)          | 2.054(6) | Zn(4)-O(8)#1         | 2.096(5) |
| O(10)#2-Zn(1)-O(16)  | 100.8(2) | O(3)#4-Zn(3)-O(15)   | 99.3(2)  |
| O(10)#2-Zn(1)-O(15)  | 112.0(3) | O(3)#4-Zn(3)-O(9)#1  | 80.5(2)  |
| O(16)-Zn(1)-O(15)    | 83.4(2)  | O(15)-Zn(3)-O(9)#1   | 179.8(3) |
| O(10)#2-Zn(1)-O(2)#3 | 78.6(2)  | O(3)#4-Zn(3)-O(13)   | 164.6(2) |
| O(16)-Zn(1)-O(2)#3   | 176.3(3) | O(15)-Zn(3)-O(13)    | 94.8(2)  |
| O(15)-Zn(1)-O(2)#3   | 100.2(2) | O(9)#1-Zn(3)-O(13)   | 85.4(2)  |
| O(10)#2-Zn(1)-O(6)   | 160.5(2) | O(3)#4-Zn(3)-O(16)   | 109.1(3) |
| O(16)-Zn(1)-O(6)     | 97.0(2)  | O(15)-Zn(3)-O(16)    | 83.1(2)  |
| O(15)-Zn(1)-O(6)     | 78.0(2)  | O(9)#1-Zn(3)-O(16)   | 97.0(2)  |
| O(2)#3-Zn(1)-O(6)    | 83.2(2)  | O(13)-Zn(3)-O(16)    | 78.7(2)  |
| O(10)#2-Zn(1)-O(5)   | 99.4(2)  | O(3)#4-Zn(3)-O(12)   | 100.6(2) |
| O(16)-Zn(1)-O(5)     | 91.9(2)  | O(15)-Zn(3)-O(12)    | 98.2(2)  |
| O(15)-Zn(1)-O(5)     | 148.6(2) | O(9)#1-Zn(3)-O(12)   | 81.8(2)  |
| O(2)#3-Zn(1)-O(5)    | 84.7(2)  | O(13)-Zn(3)-O(12)    | 71.1(2)  |
| O(6)-Zn(1)-O(5)      | 71.7(2)  | O(16)-Zn(3)-O(12)    | 149.7(2) |
| O(4)#4-Zn(2)-O(15)   | 100.7(2) | O(11)#2-Zn(4)-O(16)  | 100.8(2) |
| O(4)#4-Zn(2)-O(6)    | 94.5(3)  | O(11)#2-Zn(4)-O(8)#1 | 166.1(3) |
| O(15)-Zn(2)-O(6)     | 79.4(2)  | O(16)-Zn(4)-O(8)#1   | 92.4(2)  |
| O(4)#4-Zn(2)-O(1)#3  | 166.5(3) | O(11)#2-Zn(4)-O(1)   | 93.4(2)  |
| O(15)-Zn(2)-O(1)#3   | 92.5(2)  | O(16)-Zn(4)-O(1)     | 102.3(3) |
| O(6)-Zn(2)-O(1)#3    | 90.8(2)  | O(8)#1-Zn(4)-O(1)    | 79.3(2)  |
| O(4)#4-Zn(2)-O(8)    | 95.2(2)  | O(11)#2-Zn(4)-O(13)  | 96.0(2)  |
| O(15)-Zn(2)-O(8)     | 101.7(3) | O(16)-Zn(4)-O(13)    | 79.1(3)  |
| O(6)-Zn(2)-O(8)      | 169.8(2) | O(8)#1-Zn(4)-O(13)   | 90.9(2)  |
| O(1)#3-Zn(2)-O(8)    | 79.1(2)  | O(1)-Zn(4)-O(13)     | 170.1(2) |
| O(4)#4-Zn(2)-O(18)   | 86.0(3)  | O(11)#2-Zn(4)-O(17)  | 85.7(3)  |

|                    |          |                    |          |
|--------------------|----------|--------------------|----------|
| O(15)-Zn(2)-O(18)  | 169.3(3) | O(16)-Zn(4)-O(17)  | 168.9(3) |
| O(6)-Zn(2)-O(18)   | 91.8(3)  | O(8)#1-Zn(4)-O(17) | 82.1(3)  |
| O(1)#3-Zn(2)-O(18) | 81.3(2)  | O(1)-Zn(4)-O(17)   | 86.1(3)  |
| O(8)-Zn(2)-O(18)   | 85.8(3)  | O(13)-Zn(4)-O(17)  | 91.4(3)  |

Symmetry codes:(I) 1+x, y, z; (II) 1+x, y, 1+z; (III) -1+x, y, z; (IV) -1+x, y, -1+z

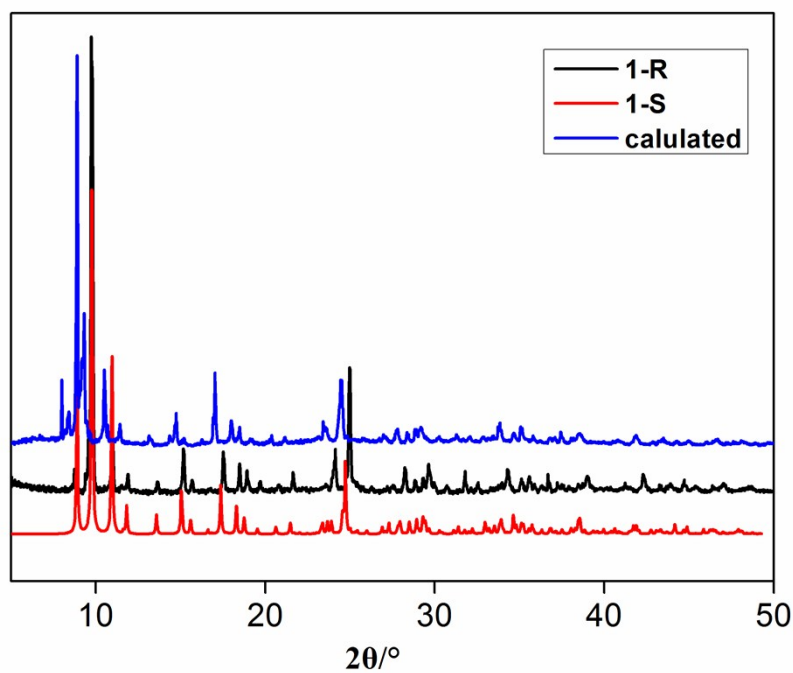

**Figure S1.** PXRD patterns of 1-R and 2-S

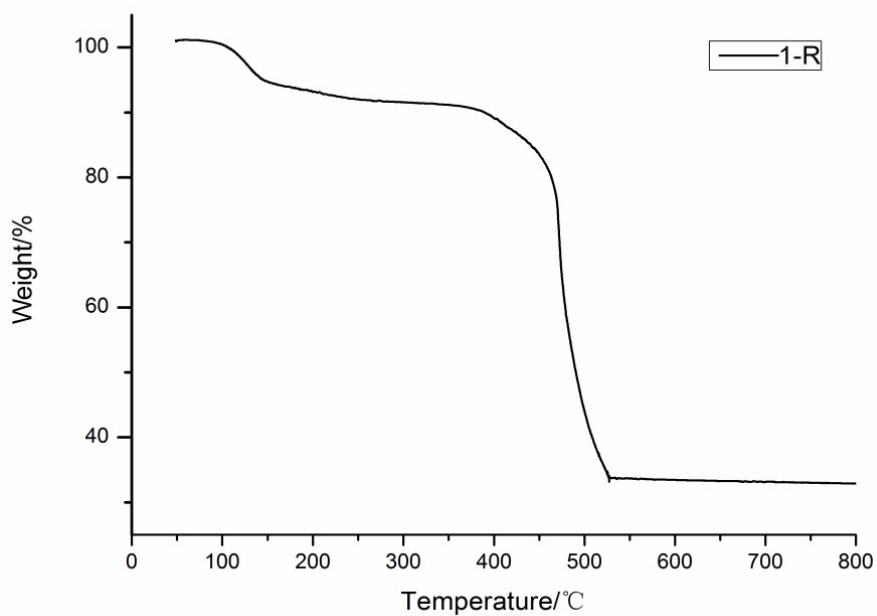

**Figure S2.** TGA curves of 1-R

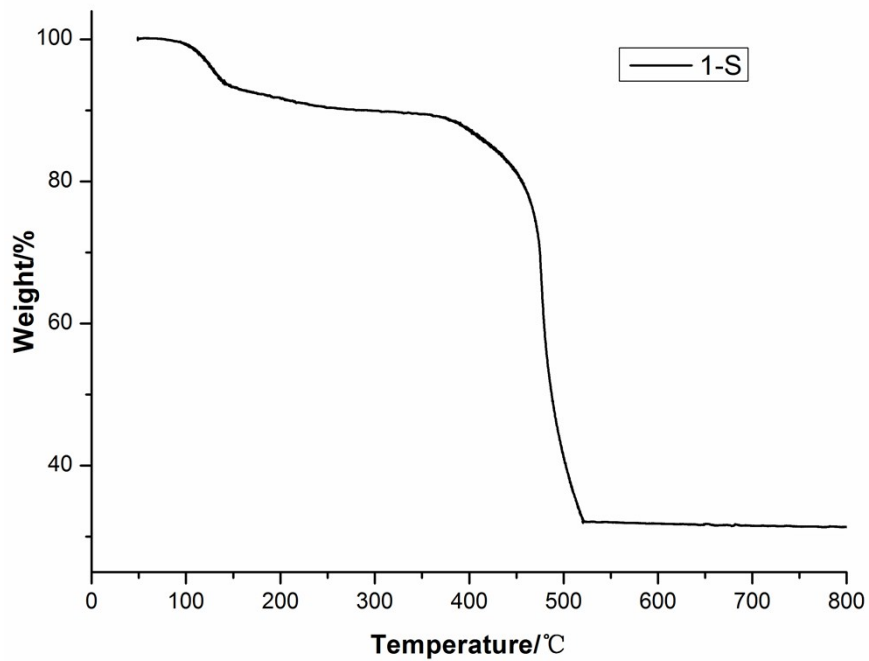

**Figure S3.** TGA curves of 1-S

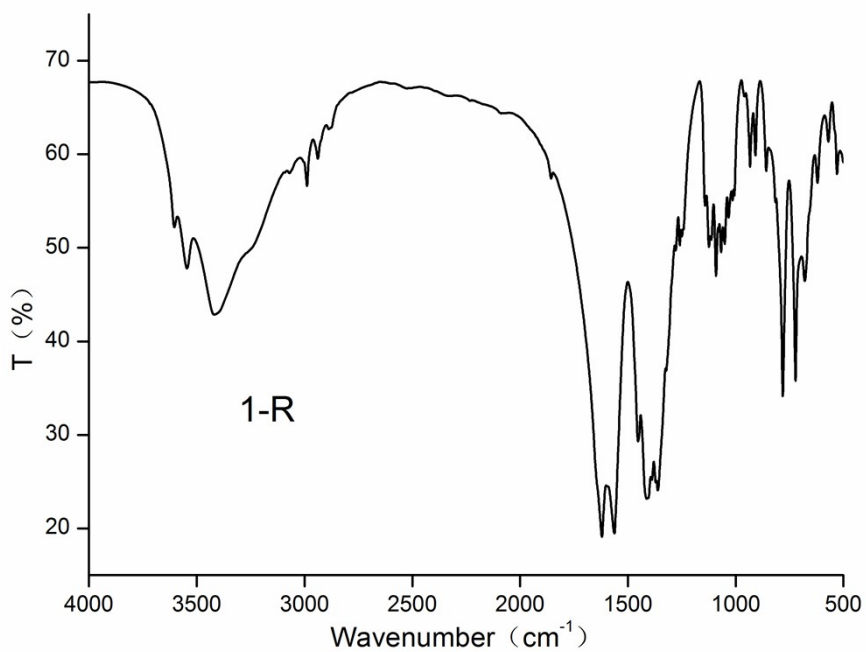

**Figure S4.** The IR spectra of 1-R

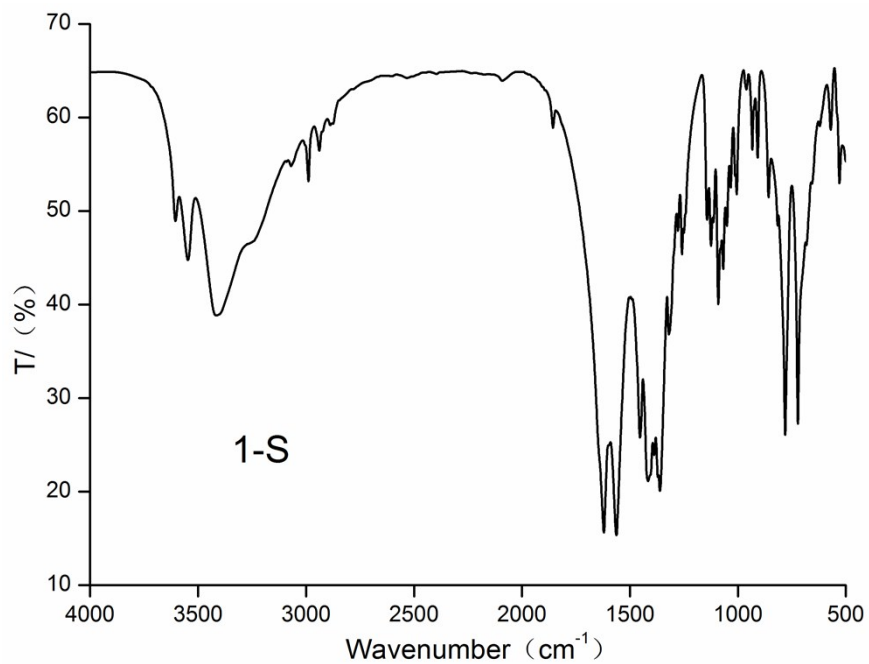

**Figure S5.** The IR spectra of **1-S**

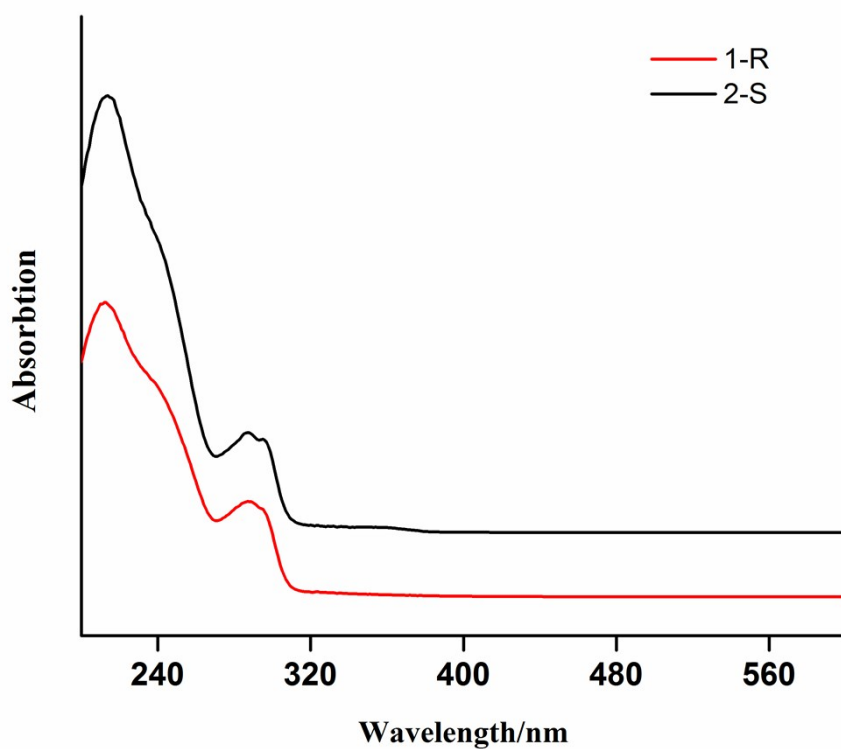

**Figure S6.** Solid-state UV curves of **1-R** and **1-S**
